# Supplementary material for: Integrating mental health into primary care: evaluation of the Health Action for Psychiatric Problems In Nigeria including Epilepsy and SubstanceS (HAPPINESS) pilot project
Source: Springer Nature journal article supplement (doi:10.1186/s12913-022-07703-1), 2022-03-12
Supplement: MOESM2 [file 20213468]

## The HAPPINESS Project Drug Revolving Fund (DRF)

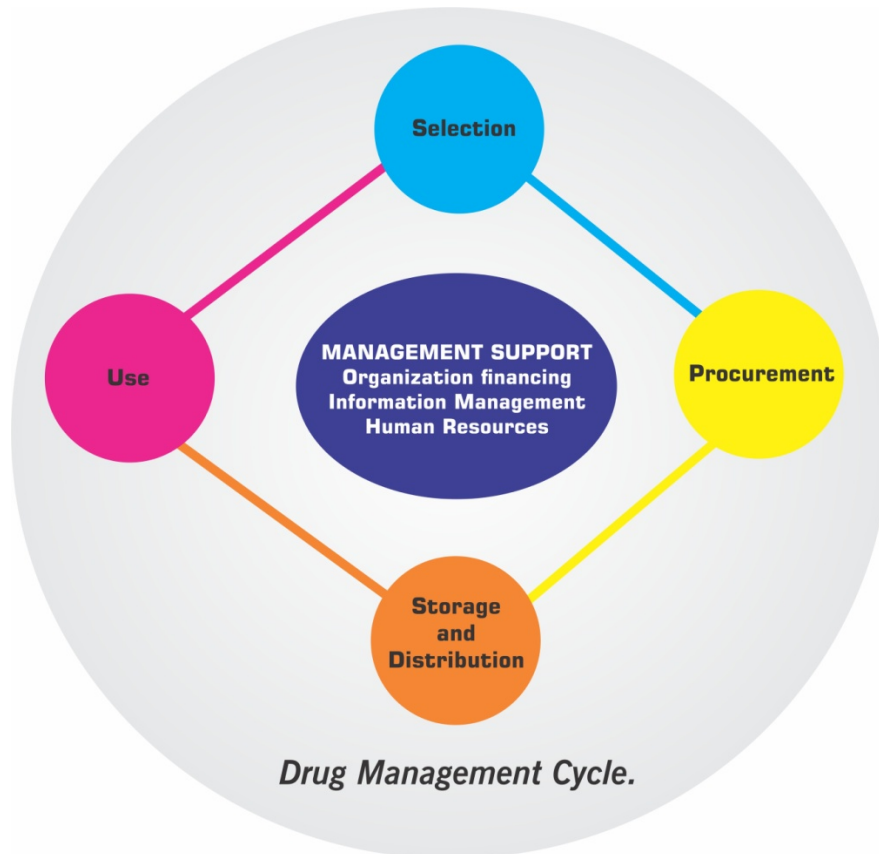

### **Management:**

The HAPPINESS Project DRF will be managed by the HAPPINESS Healthcare Foundation within existing platform of Imo State Primary Care Development agency. The board of trustees will seek the services of a pharmacist who will oversee the day-to-day administration of the DRF with the HAPPINESS Project coordinator.

### **Financing:**

Funding for the DRF will be included as a line item in the HAPPINESS Project 2019 and subsequent years budget.

Direct medication donation from donor agencies will be rolled into the DRF and priced at same rate as purchased medications to maintain the supply chain.

**Accounting records:**

At the local site and central administration level, the DRF manual on financial management and accounting system that tracks supply, utilization, stocking, re-stocking and finances will be used.

Accounting records will be properly and promptly updated.

**Internal and external audit:**

External audit will be done at the central supply level while at the facility level an internal audit will be done with reporting directly to the head of the health center.

**Incentive payment:**

We anticipate that the DRF operations will increase the overall workload of the clinics. The clinicians at the primary care clinic will be paid a form of incentive to ensure the success of the scheme.

**Cash and carry:**

All sales of drugs should be on cash and carry basis. No credit sales. Requisition system will be the “Pull” system to avoid the expiring of drugs and other health commodities. Cash realized from the sale of drugs will be paid into the project account. Both the health worker and project coordinator will acknowledge in writing payment made for drugs by the health worker. The health workers will remit payments for drugs dispensed at monthly intervals. For easy reference, documents should be numbered and put into different files.

**Training:**

Opportunities for the training of operators of the DRF will be provided regularly to enhance the quantity and quality of services rendered.

**Management Information System (MIS):**

The appropriate indicator forms developed for the purpose of monitoring the DRF will be used as required. The information derived from the exercise will be appropriately disseminated and used to improve the system.

**Pilferage/Theft:**

Acceptable loss due to pilferage will not exceed 2% while loss due to breakages and stock expiry will not exceed 3%.

**Pricing:**

Retail pricing at the facility level will consider purchase price, transportation charges and markup to cover administrative and other costs.

**Steps and Procedures in Drug Revolving Fund**

1. Selection of Drugs in HAPPINESS Project DRF Scheme will be based on the following factors:

- Keeping costs of drugs and dosage forms affordable and cost-effective so as to optimize the use of financial resources.
- Having drugs available for the treatment of the most prevalent MNS disorders at the primary care levels
- Consistent availability of safe, effective and good quality drugs.

Drugs will be selected based on the Nigeria Essential Drug Lists (EDLs) which used the WHO model as a template. The EDLs is based on National Health Policies and, on National Drug Policies.

The International Nonproprietary Names (INNs), also known as generic names, will be used in identifying selected drugs. However, the choice of drugs by generic names requires the existence of an effective Drug Regulatory Authority (NAFDAC) to ensure the availability of good-quality, safe, effective and affordable drugs. The HAPPINESS Project DRF will reflect the needs of the Primary Health Centers (PHCs), which is the main focus of this project. In general, PHCs usually have ten to thirty drugs from the national essential drugs lists. This small number of drugs makes procurement, storage and distribution easy.

## **2. Procurement of Drug Requirements**

Our procurement process will be based on drug quantification and tender management. We will start with selected drugs, dosage forms and available financial resources. The following procedures will be adopted in procuring drugs:

- Estimating quantity of each drug product required for a given period,
- Finding out the prices of the different drug dosage forms required
- Allocating funds for each drug dosage form depending on:
  - Priority nature of drug and dosage form,
  - Available finances

## **3. Estimation of Drug Requirements**

The estimate of the drug and dosage forms required for a given period will be undertaken to avoid shortages (out of stock), ensure credible health care service, prevent excess stock and avoid waste (loss or mismanagement of financial resources). The following factors influences choice and quantity of drugs:

- Population which the health center serves;
- MNS Disorders pattern;

- Monthly (rate of) drug consumption;
- Knowledge of quantity of each dosage form that is regularly consumed
- Delivery (lead) time;
- Time lag between placing orders and receiving the orders;
- Request indicator (re-order level);
- Quantity of drug product that serves as a signal for re-ordering.

The maximum quantity of drugs held in stock will be determined by distance and accessibility from the central office, size of the health center store and number of clients (patients) visiting the health center. The following three factors will be considered as the basis for calculating the appropriate quantity of a particular drug to be ordered.

#### **-Delivery (Lead) time**

It is the estimated time between ordering drugs and receiving the drugs. It is also the time when new stock is ordered and when it is received and available for use.

Delivery time may be days or weeks; it may be affected by the following:

- Poor road conditions, particularly in the rainy season
- Transportation difficulties
- Consumption rate of drugs

#### **Receipt of drugs at the health center**

In receipt of drug at the health center, the following should be noted:

1. Check that the quantity issued actually corresponds to the quantity indicated on the stores requisition/delivery (issue) form.
2. Check off each drug after checking.
3. Take note of the unit price of each drug and compare it to the previous unit price.

4. Check that all original boxes, tins or bottles are unopened and are in good condition.
5. Check the labels and ensure that there are no expired drugs being received.
6. Any drugs already expired or soon to expire that cannot be consumed before expiration or drugs not in good condition should be returned for destruction or redistribution to other Center.

### **Requisition/Delivery (Issue) Form**

This form is to be filled when the PHC dispensary is ordering items from the central office.

In filling the forms, one must ensure that the following items are filled in correctly.

1. Name of drug and dosage form;
2. Unit of issue and quantity requested;
3. The requisition number (it is preferable to begin with a new number each year, e.g.)
4. The name of the dispensary and the date the requisition was made;
5. The name and signature of the health worker making the requisition
6. Name and signature of the health worker making the requisition











## Drug Revolving Fund

Medication cost (For PHC notice board)

| <b>Medication</b>   | <b>Dispensing Price</b> |
|---------------------|-------------------------|
|                     |                         |
| Tabs Amitriptylline | 10.00 Naira each        |
| Tabs Carbamazepine  | 15.00 Naira each        |
| Tabs Chlorpromazine | 12.00 Naira each        |
| Tabs Benzhexol      | 10.00 Naira each        |
| Tabs Haloperidol    | 10.00Naira each         |
|                     |                         |
|                     |                         |
